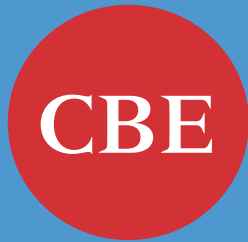

# Life Sciences Education

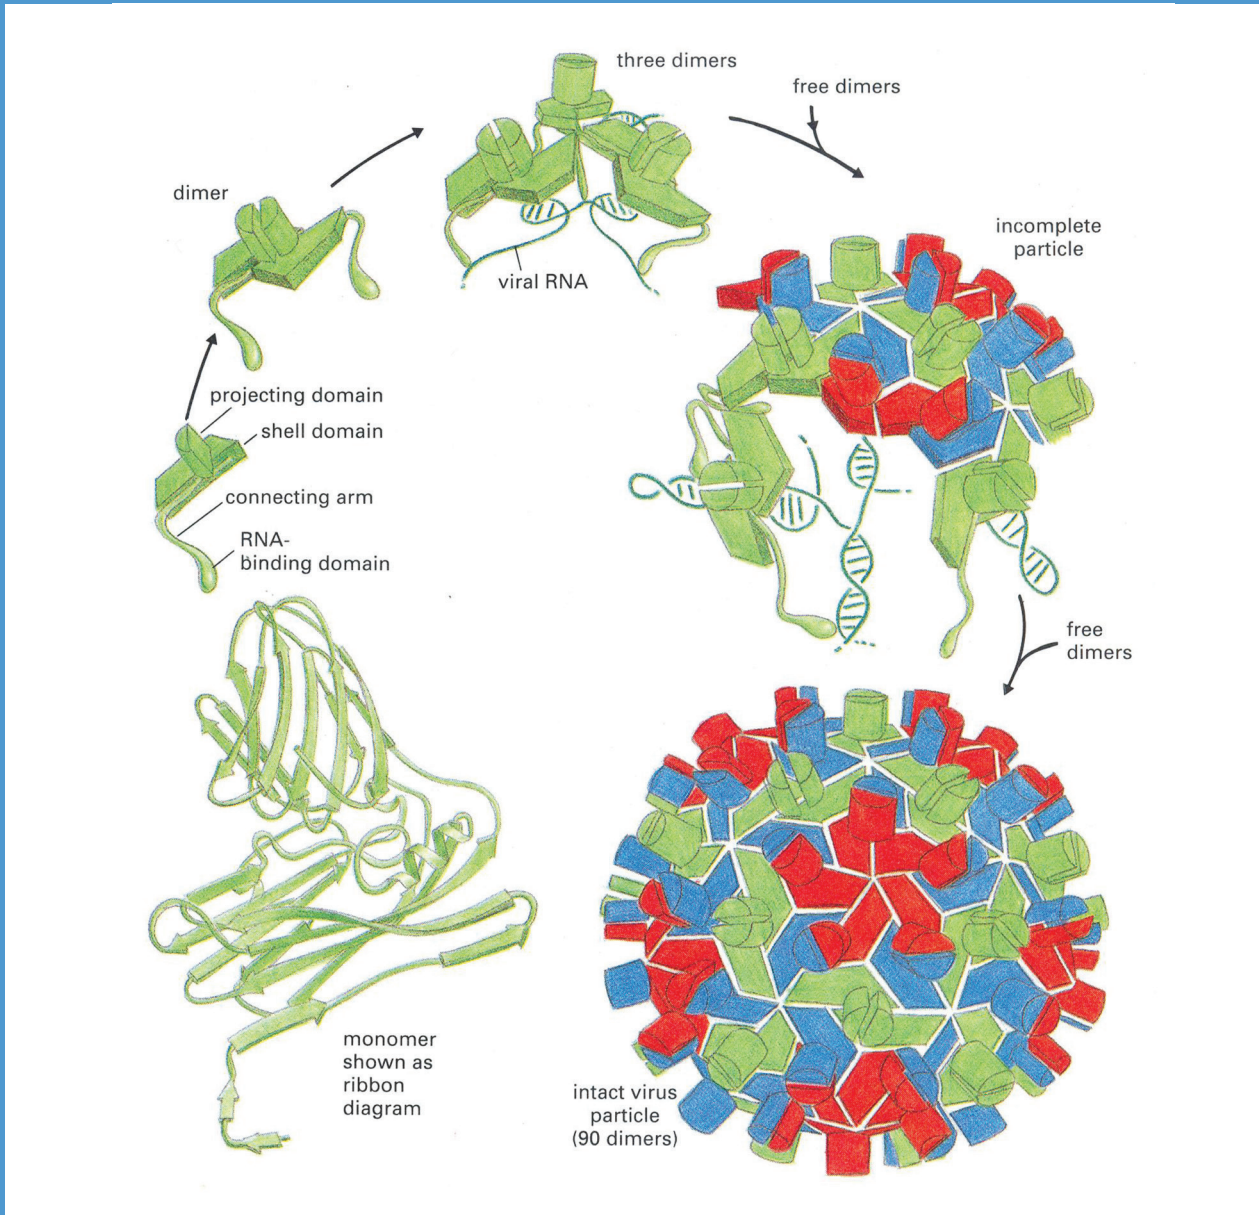

## Representations in Instruction
